# Supplementary material for: Clostridium butyricumCombined withBifidobacterium infantisProbiotic Mixture Restores Fecal Microbiota and Attenuates Systemic Inflammation in Mice with Antibiotic-Associated Diarrhea
Source: Hindawi journal article supplement (doi:10.1155/2015/582048), 2015-01-01

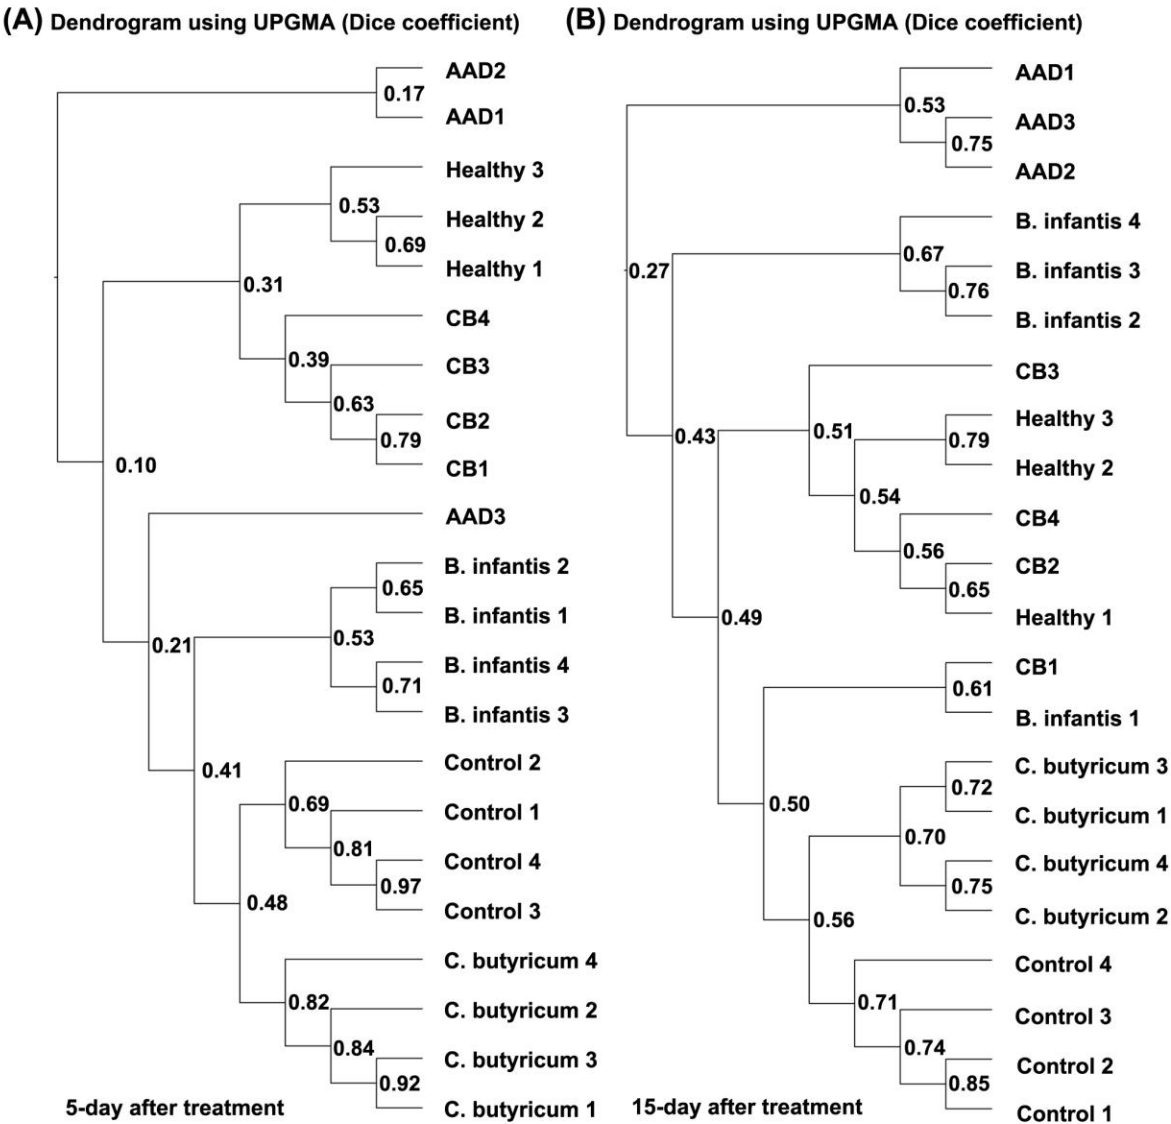

Supplement: f1 [file 582048.f1.pdf]
